# Supplementary material
Source: publisher site journal article supplement (https://www.dovepress.com/article/353131)
Supplement: Supplementary file 1 [file get_supplementary_file.php]

**Table S1** Demographic and reproductive characteristics of study populations

| **Characteristics** | **Total**  **(n= 282)** | **Good sleep (PSQI≤5)**  **(n = 220)** | **Poor sleep (PSQI>5)**  **(n = 62)** | ***P* value a** |
| --- | --- | --- | --- | --- |
| Age (year)b | 32.49 ±4.98 | 32.44 ±4.98 | 32.65 ±5.02 | 0.900 |
| BMI (kg/m2) b | 24.11 ±3.45 | 24.12 ±3.32 | 24.08 ±3.87 | 0.745 |
| Duration of infertility (years) b | 3.30 ±2.18 | 3.13 ±2.01 | 3.91 ±2.61 | 0.063 |
| College and higher, n (%) | 126 (44.68) | 102(46.36) | 24(38.71) | 0.284 |
| Employed, n (%) | 263 (93.26) | 206(93.64) | 57(91.94) | 0.637 |
| Smoking, n (%) | 107 (37.94) | 82(37.27) | 25(40.32) | 0.662 |
| Drinking Alcohol, n (%) | 55 (19.50) | 40(18.18) | 15(24.19) | 0.291 |
| Drinking Coffee, n (%) | 27 (9.57) | 19(8.64) | 8(12.90) | 0.313 |
| Physically activity, n (%) | 78 (27.66) | 62(28.18) | 16(25.81) | 0.712 |
| Fever, n (%) | 10 (3.55) | 6(2.73) | 4(6.45) | 0.161 |
| Global PSQI score b | 4.02 ±2.42 | 3.04 ±1.49 | 7.52 ±1.79 | < 0.001 |
| Duration of sleep (hours) b | 7.44 ±0.94 | 7.65 ±0.81 | 6.69 ±1.00 | < 0.001 |
| Primary infertility diagnosis, n (%) |  |  |  | 0.009 |
| Male factor | 53 (18.79) | 33(15.00) | 20(32.26) |  |
| Female factor | 206 (73.05) | 168(76.36) | 38(61.29) |  |
| Ovulation disorders | 24 (11.65) | 20(11.90) | 4(10.53) |  |
| Diminished ovarian reserve | 26 (12.62) | 21(12.50) | 5(13.16) |  |
| Tubal | 113 (54.85) | 90(53.57) | 23(60.53) |  |
| Endometriosis | 27 (13.11) | 22(13.10) | 5(13.16) |  |
| Uterine | 16 (7.77) | 15(8.93) | 1(2.63) |  |
| Unexplained | 23 (8.16) | 19(8.64) | 4(6.45) |  |
| No. of embryos transferred, n (%) |  |  |  | 0.096 |
| No embryos transferred | 15 (5.32) | 11(5.00) | 4(6.45) |  |
| 1 embryo | 56 (19.86) | 38(17.27) | 18(29.03) |  |
| 2 embryos | 211 (74.82) | 171(77.73) | 40(64.52) |  |
| Embryo transfer day, n (%) |  |  |  | 0.894 |
| No embryos transferred | 15 (5.32) | 11(5.00) | 4(6.45) |  |
| Day 2 | 37 (13.12) | 28(12.73) | 9(14.52) |  |
| Day 3 | 219 (77.66) | 173(78.64) | 46(74.19) |  |
| Day 5 | 11 (3.90) | 8(3.64) | 3(4.84) |  |
| ICSI, n (%) | 46 (16.37) | 29(13.24) | 17(27.42) | 0.008 |
| **Female partner characteristics** |  |  |  |  |
| Age (year) b | 30.05 ±3.76 | 29.89 ±3.64 | 30.65 ±4.15 | 0.231 |
| BMI (kg/m2) b | 22.28 ±3.46 | 22.38 ±3.45 | 21.93 ±3.50 | 0.227 |
| Endometrial thickness (mm) b | 10.45 ±1.80 | 10.41 ±1.70 | 10.60 ±2.11 | 0.248 |
| Oocytes retrieved (n) b | 7.95 ±3.85 | 7.88 ±3.73 | 8.21 ±4.27 | 0.671 |
| Global PSQI score b | 3.62 ±2.21 | 3.40 ±2.13 | 4.44 ±2.31 | 0.001 |
| Duration of sleep (hours) b | 7.55 ±1.65 | 7.55 ±1.71 | 7.52 ±1.43 | 0.240 |

**Note:**

a Comparison between each group: continuous variable (Kruskal-Wallis test), categorical variables (χ2 or Fisher’s exact test).

b Data were expressed as mean± standard deviation.

**Abbreviations:**

BMI, body mass index; PSQI, Pittsburg Sleep Quality Index; ICSI, intracytoplasmic sperm injection.

**Table S2**

Laboratory and clinical outcomes of ART in each group according to the paternal global PSQI scores (poor sleep group PSQI>5, good sleep group PSQI≤5)

| **Characteristics** | **Total**  **(n = 282)** | **Good sleep (PSQI≤5)**  **(n = 220)** | **Poor sleep (PSQI>5)**  **(n = 62)** | ***P* value a** |
| --- | --- | --- | --- | --- |
| Fertilization rate % (n) c | 64.45 (1445/2242) | 67.22(1165/1733) | 55.01(280/509) | < 0.001 |
| Good quality embryos rate % (n) d | 57.05 (813/1425) | 55.86(639/1144) | 61.92(174/281) | 0.098 |
| Implantation rate % (n) e | 45.82 (219/478) | 46.84(178/380) | 41.84(41/98) | 0.429 |
| Positive pregnancy rate % (n) f | 68.54 (183/267) | 70.81(148/209) | 60.34(35/58) | 0.161 |
| Clinical pregnancy rate % (n) g | 61.42 (164/67) | 63.64(133/209) | 53.45(31/58) | 0.187 |
| Live birth rate % (n) h | 52.81 (141/267) | 55.02(115/209) | 44.83(26/58) | 0.197 |
| Miscarriage rate % (n) i | 12.20 (20/164) | 11.28(15/133) | 16.13(5/31) | 0.457 |
| Birth weight (g) b | 2926.84 ±596.61 | 2953.65 ±614.92 | 2808.23 ±501.10 | 0.153 |

**Note:**

a Comparison between each group: continuous variable (Kruskal-Wallis test), categorical variables (χ2-test). *P* value was adjusted using Benjamini-Hochberg False Discovery Rate (FDR).

b Data were expressed as mean± standard deviation.

c Fertilization rate: normally fertilized oocytes/inseminated oocytes;

d Good quality embryo rate: optimal embryos/cleavage embryos;

e Implantation rate: number of gestational sac/ number of embryos transferred;

f Positive pregnancy rate: positive β-hcg/fresh embryo transfer cycles;

g Clinical pregnancy rate: clinical pregnancies/fresh embryo transfer cycles;

h Live birth rate: live births/fresh embryo transfer cycles;

i Miscarriage rate: miscarriages/clinical pregnancies.

**Abbreviations**:

ART, assisted reproductive technology; PSQI, Pittsburg Sleep Quality Index.

**Table S3**

Linear and logistic regression analysis of the association between the paternal sleep quality (poor sleep group PSQI>5, good sleep group PSQI≤5) and laboratory and clinical outcomes

|  | **Good sleep (PSQI≤5) vs. Poor sleep (PSQI>5)** | | | |
| --- | --- | --- | --- | --- |
|  | u-β/ OR (95%CI) | *P* value | a-β/ OR (95%CI) | *P* value a |
| Fertilization rate (%) b f | -10.24( -17.45, -3.03 ) | 0.012 | -9.74( -17.29, -2.18) | 0.024 d |
| Good quality embryos rate (%) b g | -1.56( -10.54, 7.41) | 0.197 | -0.93( -10.36, 8.50) | 0.847 d |
| Birth weight (g) b | -145.42( -401.34, 110.50) | 0.213 | -148.89( -447.28, 149.49) | 0.390 e |
| Positive pregnancy c h | 0.63( 0.34, 1.15) | 0.213 | 0.60( 0.31, 1.20) | 0.185 e |
| Clinical pregnancy c i | 0.66( 0.36, 1.18) | 0.316 | 0.59( 0.30, 1.13) | 0.151 e |
| Live birth c j | 0.66( 0.37, 1.19) | 0.537 | 0.54( 0.28, 1.05) | 0.102 e |
| Miscarriage c k | 1.51( 0.50, 4.53) | 0.732 | 1.87( 0.36, 9.73) | 0.531 e |

**Notes:**

a *P* value was adjusted using Benjamini-Hochberg False Discovery Rate(FDR).

b Multiple linear regression analysis;

c Binary logistic regression analysis;

d Regression coefficients were adjusted for paternal age, BMI, smoking, alcohol drinking, and maternal age, BMI, duratioan of infertility, type of ovarian stimulation protocol, the number of retrieved oocytes, oocyte insemination technique (IVF/ICSI), global PSQI score, duration of sleep(categorical variable).

e Regression coefficients were adjusted for paternal age, BMI, smoking, alcohol drinking, and maternal age, BMI, duration of infertility, type of ovarian stimulation protocol, the number of retrieved oocytes, oocyte insemination technique (IVF/ICSI), global PSQI score, duration of sleep(categorical variable), endometrial thickness, number of embryos transferred, embryo transfer day.

f Fertilization rate(continuous variables): normally fertilized oocytes/inseminated oocytes;

g Good quality embryo rate(continuous variables): optimal embryos/cleavage embryos;

h Positive pregnancy(dichotomous variables): 12 days after embryo transfer, the level of plasma β-HCG above 10 IU/L;

i Clinical pregnancy (dichotomous variables): at 6 weeks of gestation, the presence of intrauterine pregnancy by ultrasound;

j Live birth(dichotomous variables): the birth of a neonate on or after 24 weeks of gestation;

k Miscarriage(dichotomous variables): pregnancy termination before 12 gestational weeks.

**Abbreviations:**

PSQI, Pittsburg Sleep Quality Index; u-β/ OR, unadjusted beta coefficient/odds ratio; a-β/ OR, adjusted beta coefficient/odds ratio; 95%CI, 95% confidence intervals.
